# Supplementary material
Source: PubMed Central journal article supplement (PMC8172444)
Supplement: NIHMS1690805-supplement-1.pdf [file NIHMS1690805-supplement-1.pdf]

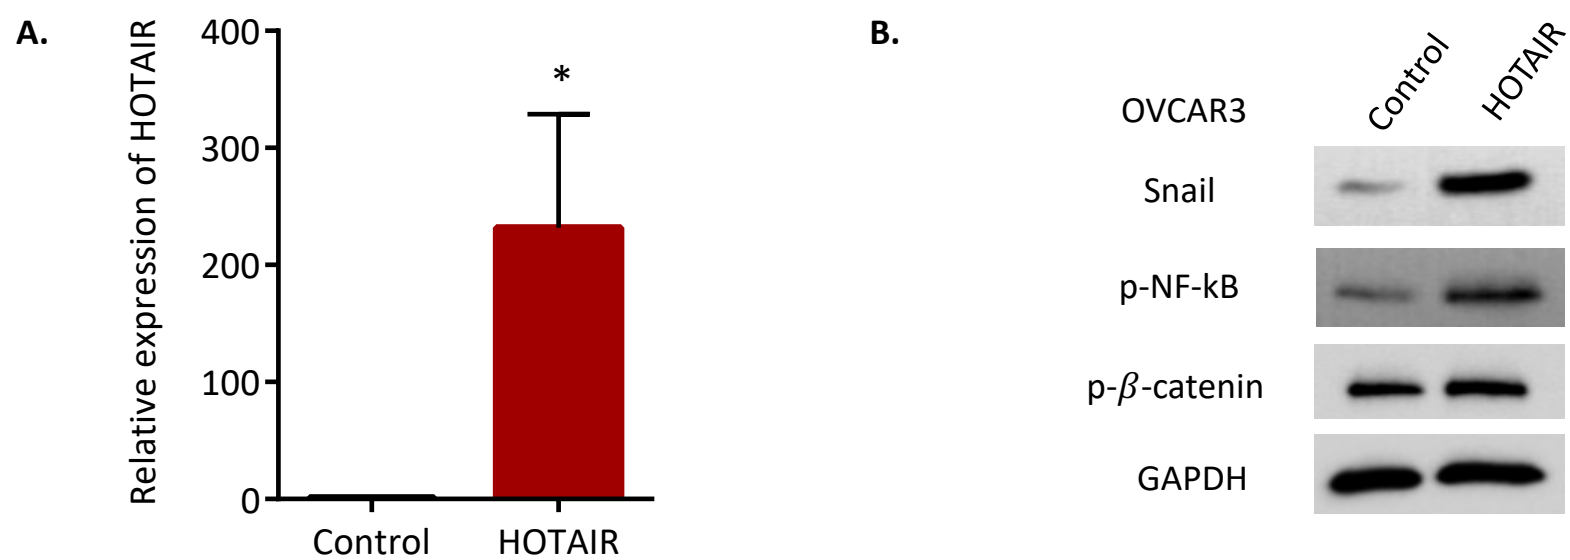

**Supplemental Figure S1. Validation of ectopic HOTAIR overexpression:**

**A)** Relative gene expression of HOTAIR in the overexpressed and empty vector control cells was validated by qPCR. **B)** HOTAIR regulated gene expression was determined by immunoblot in HOTAIR overexpressed and control cells. GAPDH was used as the loading control. Error bars represent SEM;  $n = 3$  independent experiments of triplicate assays. Data are presented as mean  $\pm$  SEM with  $p < 0.05$  (\*),  $p < 0.01$  (\*\*), and  $p < 0.005$  (\*\*\*)).

Supplemental Fig. S2

A.

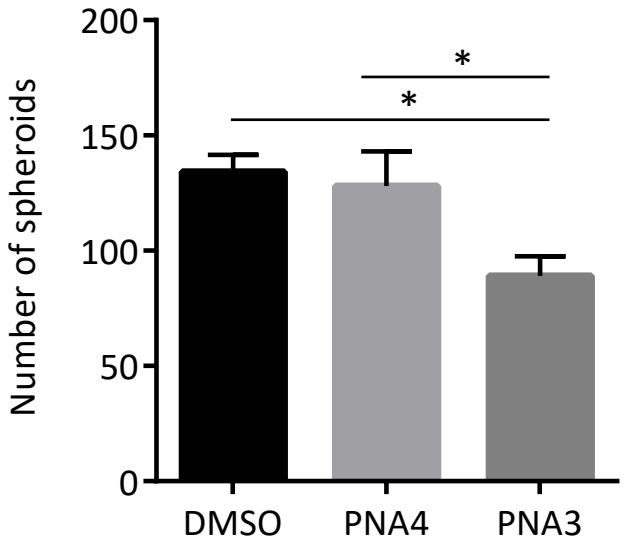

B.

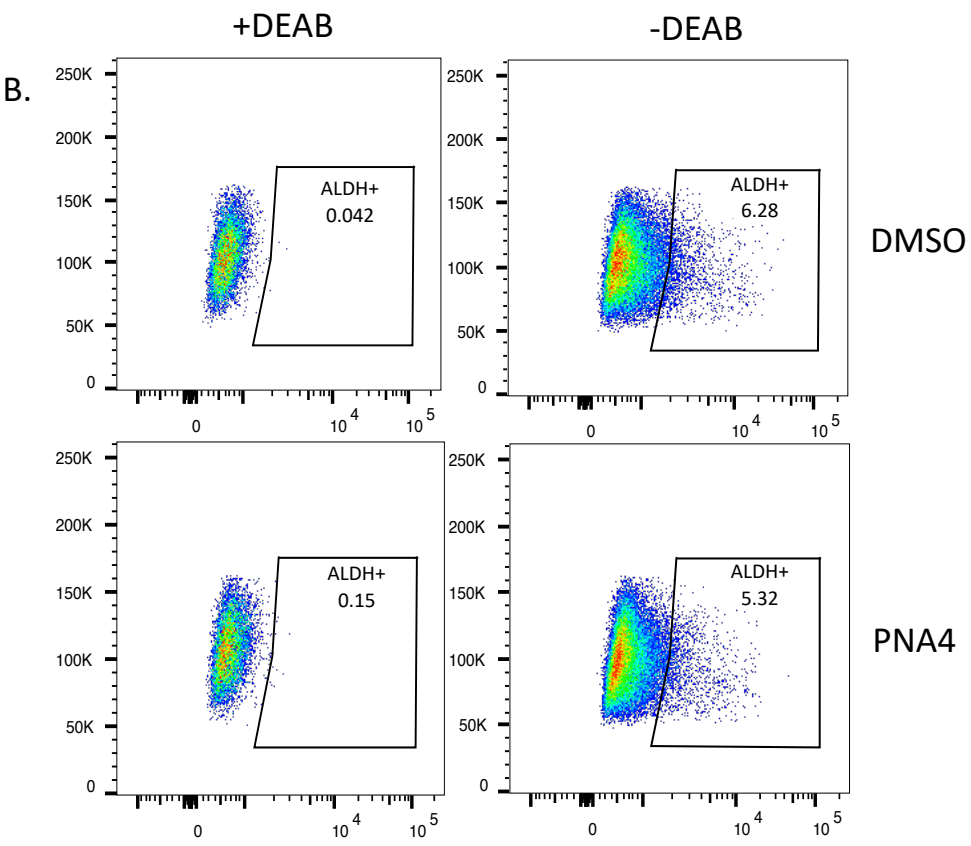

C.

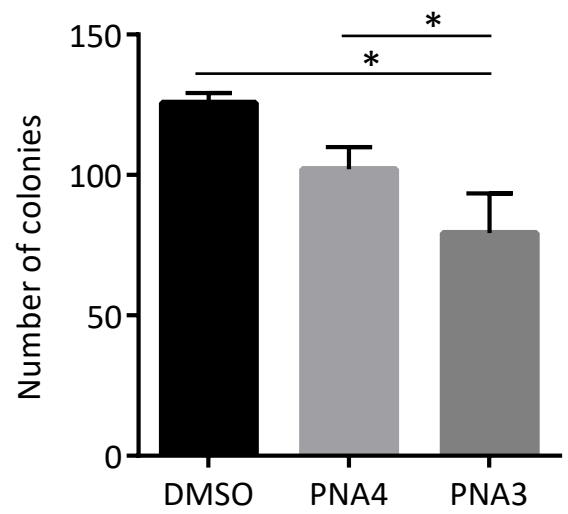

D.

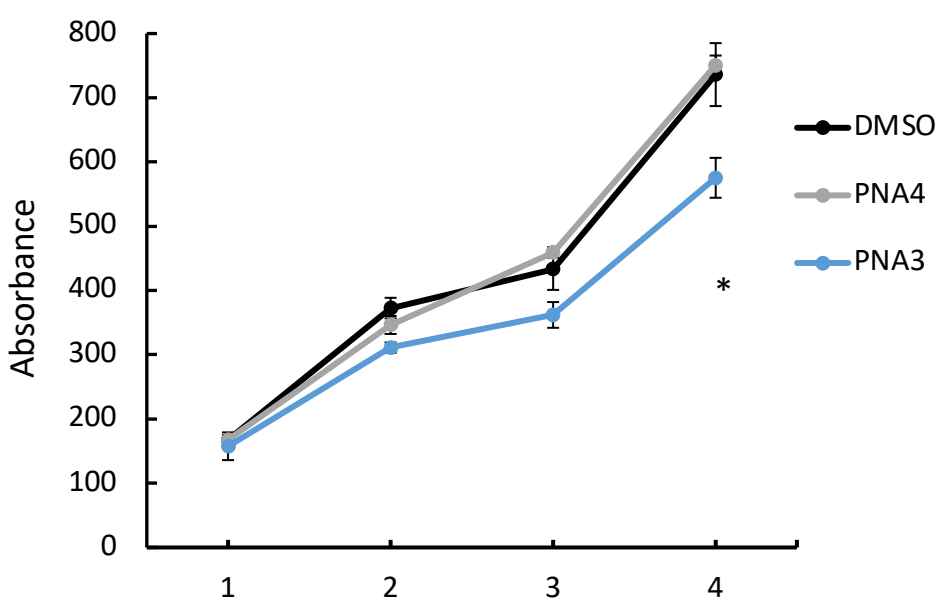

**Supplemental Figure S2. PNA4 treatment has no effect on functional characteristics of OC cells *in vitro*.** **A)** Quantification of spheroid treated with PNA4 compared with DMSO. **B)** Representative images and quantification of clonogenic survival assay after PNA3 treatment compared to PNA4. **C)** ALDH (+) population were determined by ALDEFLUOR assay using flow cytometry in DMSO compared to PNA4. **D)** Cell proliferation determined by MTT assay, PNA4 versus DMSO.

# Supplemental Fig. S3

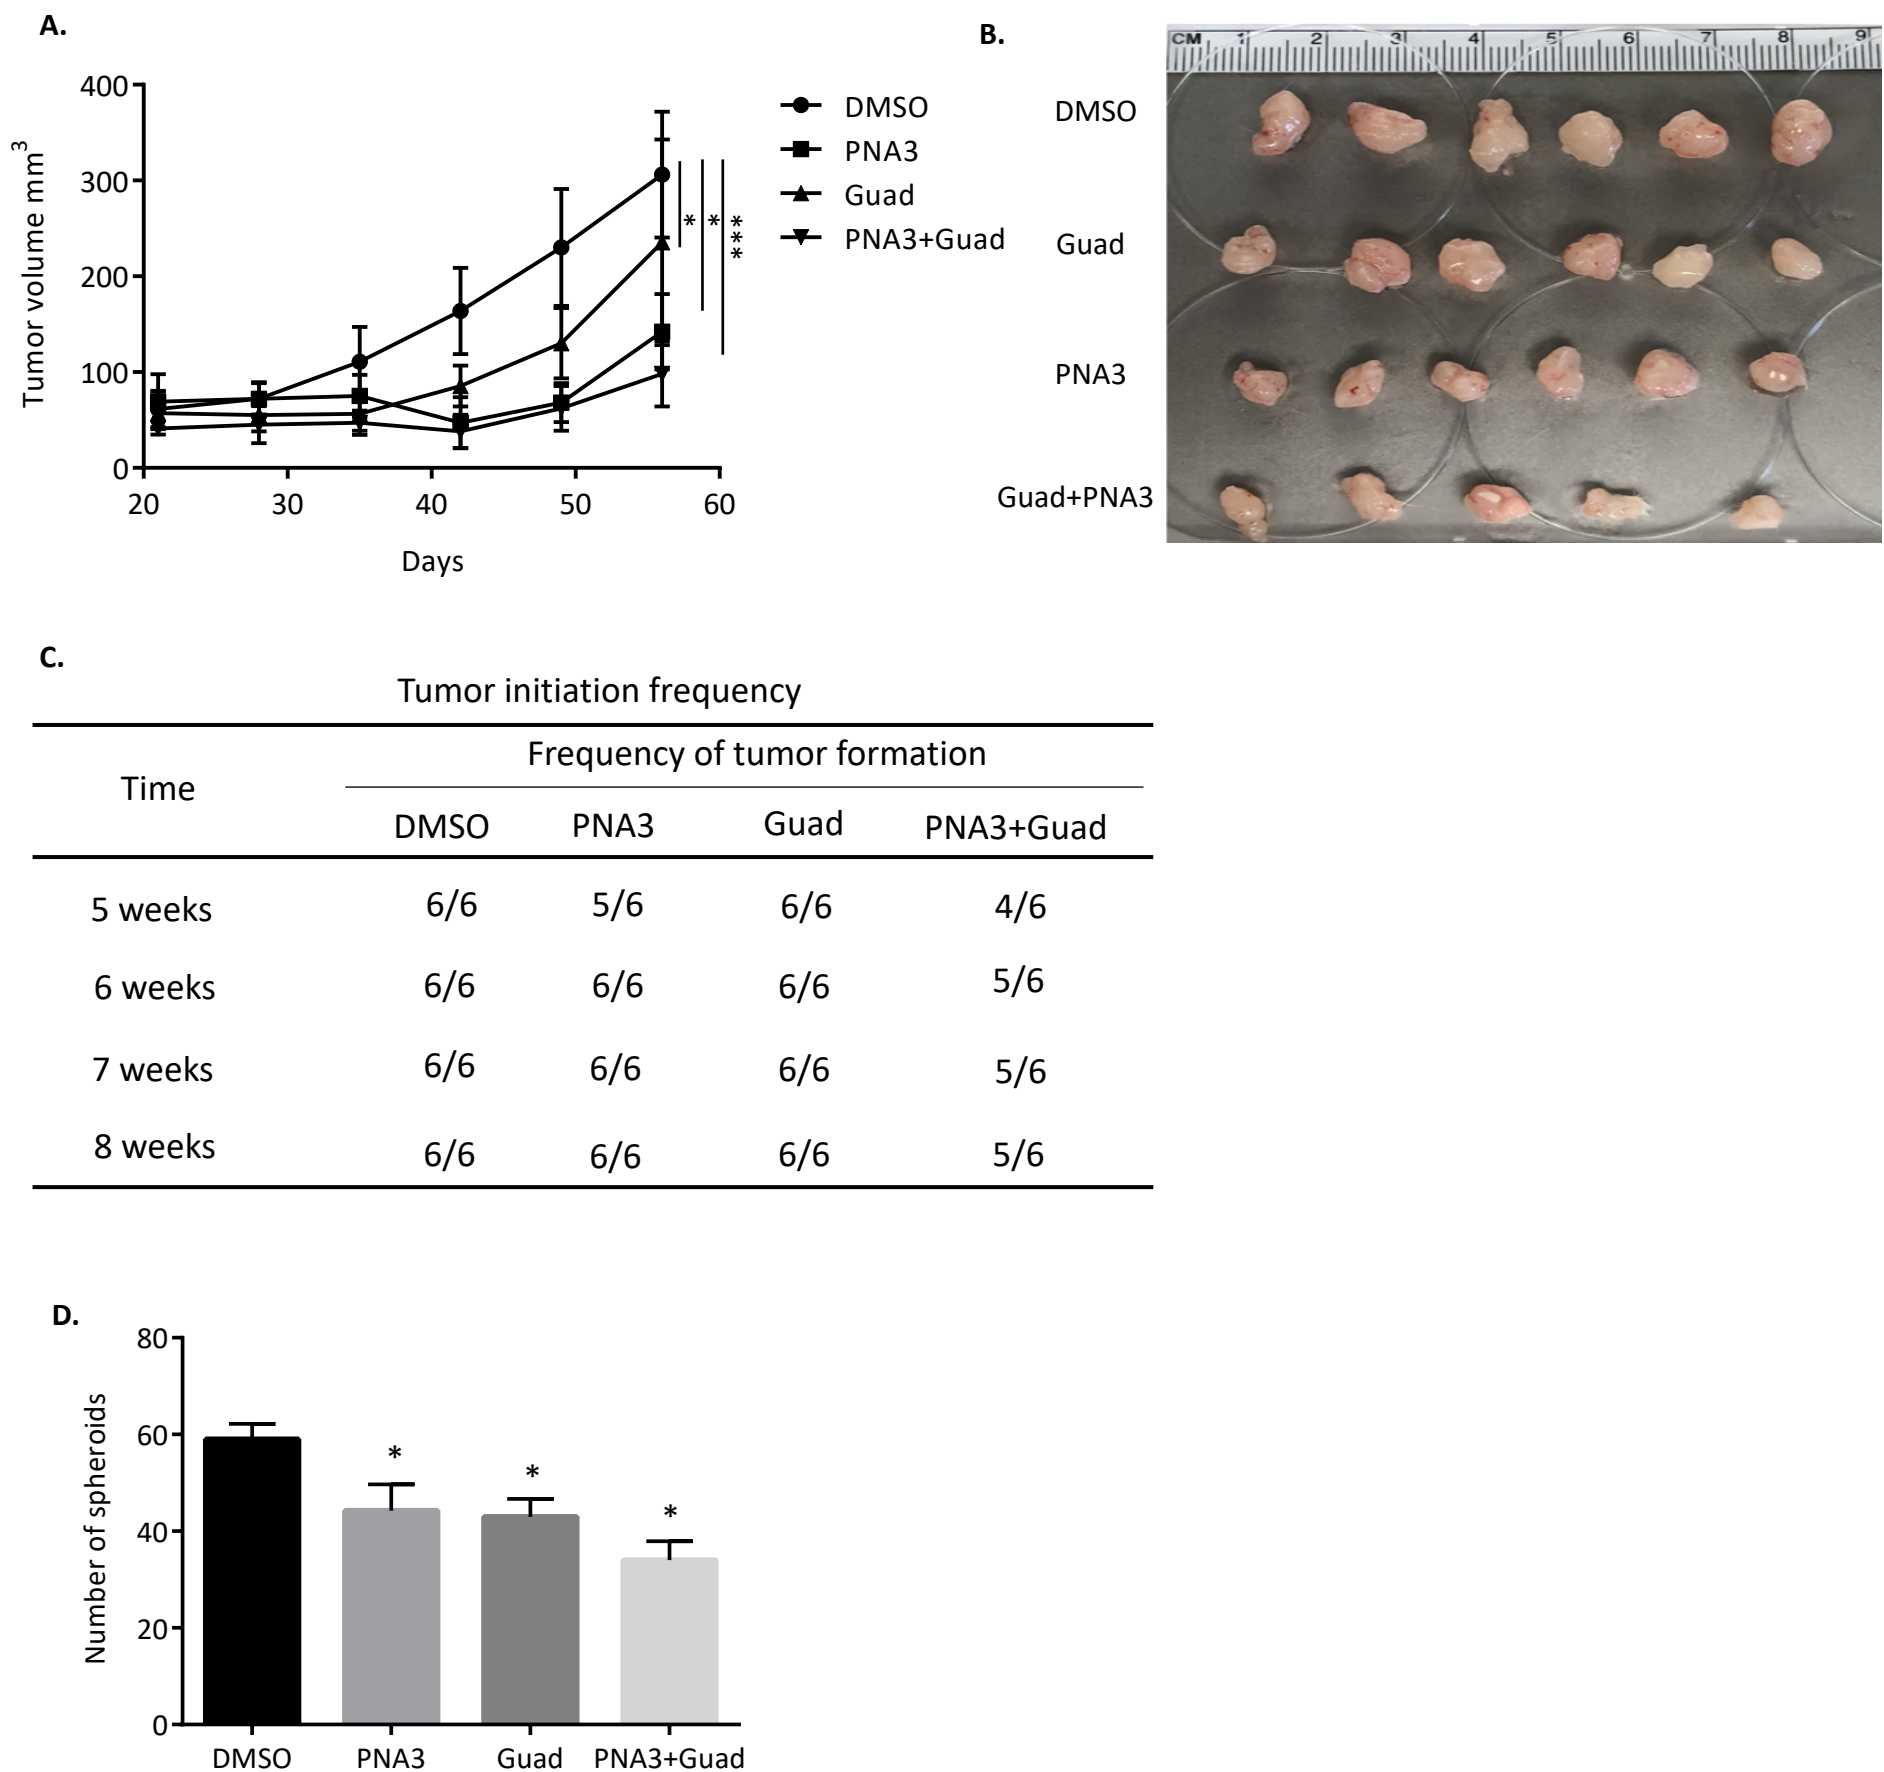

**Supplemental Figure S3. Effect of inhibiting HOTAIR and DNA methylation on ovarian tumors initiated with 50,000 OVCAR3 cells. A)** Xenograft tumor growth curve of different treatment groups. OVCAR3 sorted ALDH<sup>+</sup> cells were treated with guadecitabine alone or with PNA3 treatment. 50,000 ALDH<sup>+</sup> cells were injected s.c. into mice. **B)** Images of tumors collected at end of study. **C)** Quantification of tumor formation. **D)** Quantification of spheroid formation by tumor cells collected from mice at end of study. Data are presented as mean  $\pm$  SEM with  $p < 0.05$  (\*) and  $p < 0.005$  (\*\*\*)).
